# Supplementary material for: An LaeA- and BrlA-Dependent Cellular Network Governs Tissue-Specific Secondary Metabolism in the Human Pathogen Aspergillus fumigatus
Source: PubMed Central journal article supplement (PMC5853485; doi:10.1128/msphere.00050-18), 2018-03-14
Supplement: sph002182495sf1.pdf [file sph002182495sf1.pdf]

| 29°C  |               | 37°C  |               | - | + |
|-------|---------------|-------|---------------|---|---|
| AF293 | $\Delta$ brlA | AF293 | $\Delta$ brlA |   |   |
|       |               |       |               |   |   |
|       |               |       |               |   |   |
|       |               |       |               |   |   |
|       |               |       |               |   |   |
|       |               |       |               |   |   |
|       |               |       |               |   |   |

Afu1g17200 (SidC NRPS)

Afu1g17740 (unknown PKS)

Afu2g17600 (pksP/alb1 PKS)

Afu4g00210 (encA PKS)

Afu4g14560 (tpcC PKS)

Afu6g04740 (act1)
