# Supplementary material for: An LaeA- and BrlA-Dependent Cellular Network Governs Tissue-Specific Secondary Metabolism in the Human Pathogen Aspergillus fumigatus
Source: PubMed Central journal article supplement (PMC5853485; doi:10.1128/msphere.00050-18), 2018-03-14

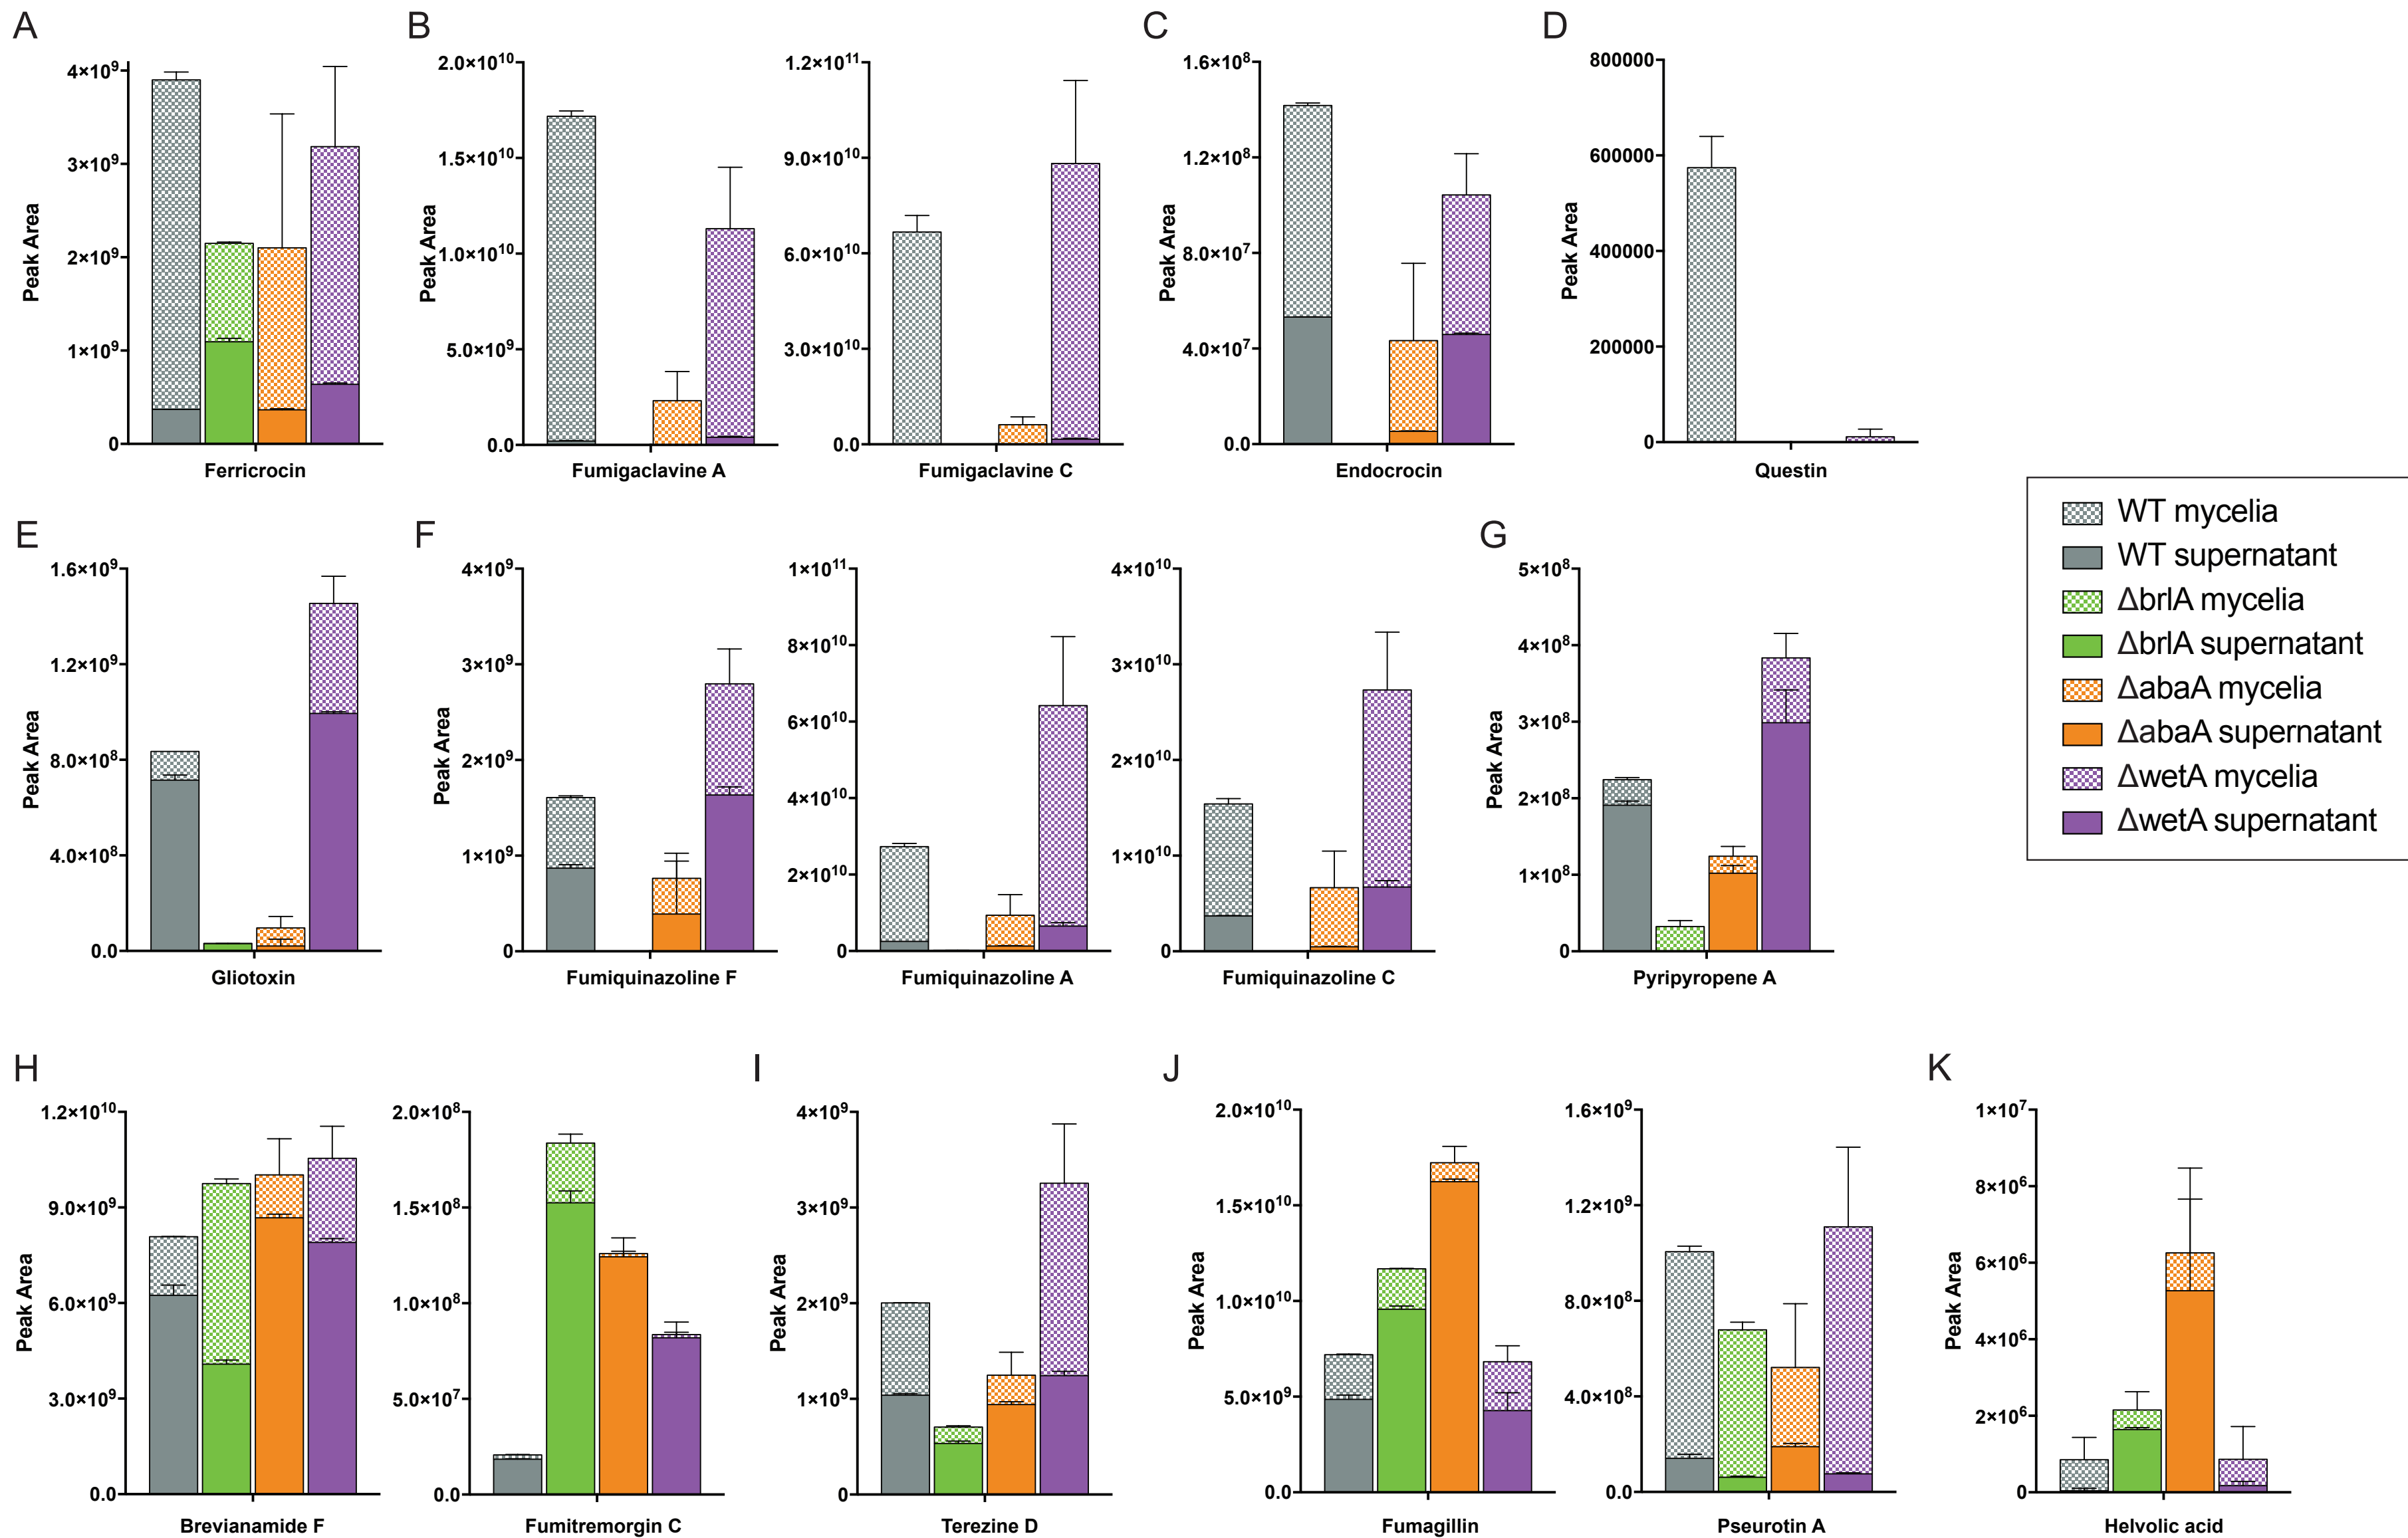

Supplement: sph002182495sf2.pdf [file sph002182495sf2.pdf]
